# Supplementary material for: Oceanic emissions unlikely to account for the missing source of atmospheric carbonyl sulfide
Source: Copernicus journal article supplement (doi:10.5194/acp-2016-778), 2016-09-12

**JULY**

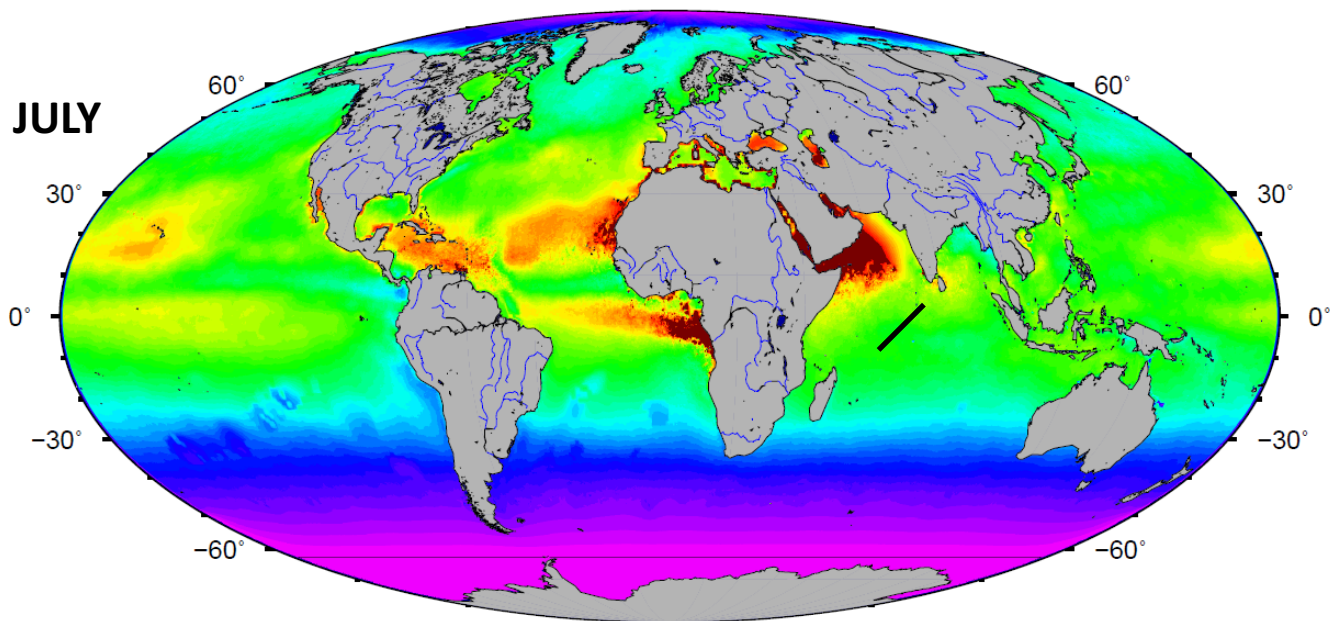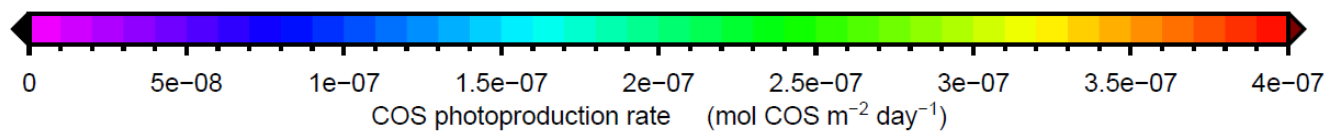

Integrated from 0- to depth of MLD

**OCTOBER**

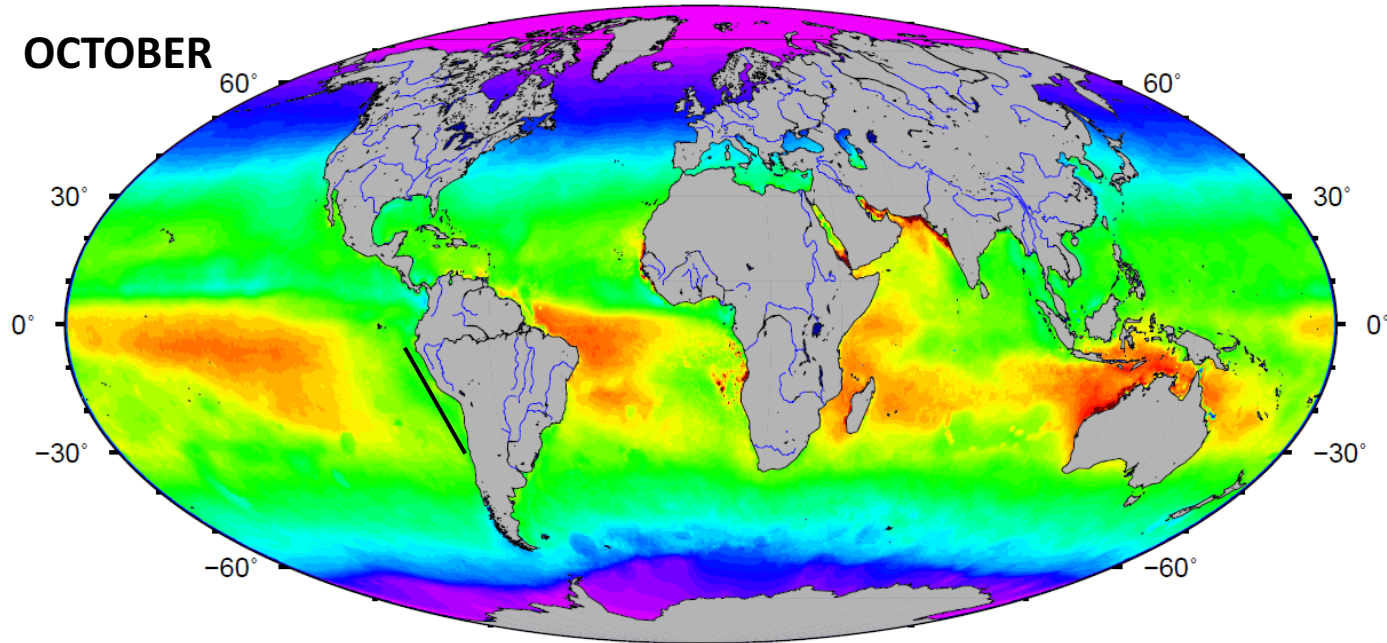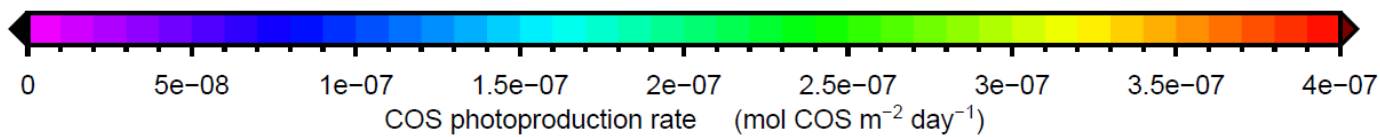

— Cruise tracks

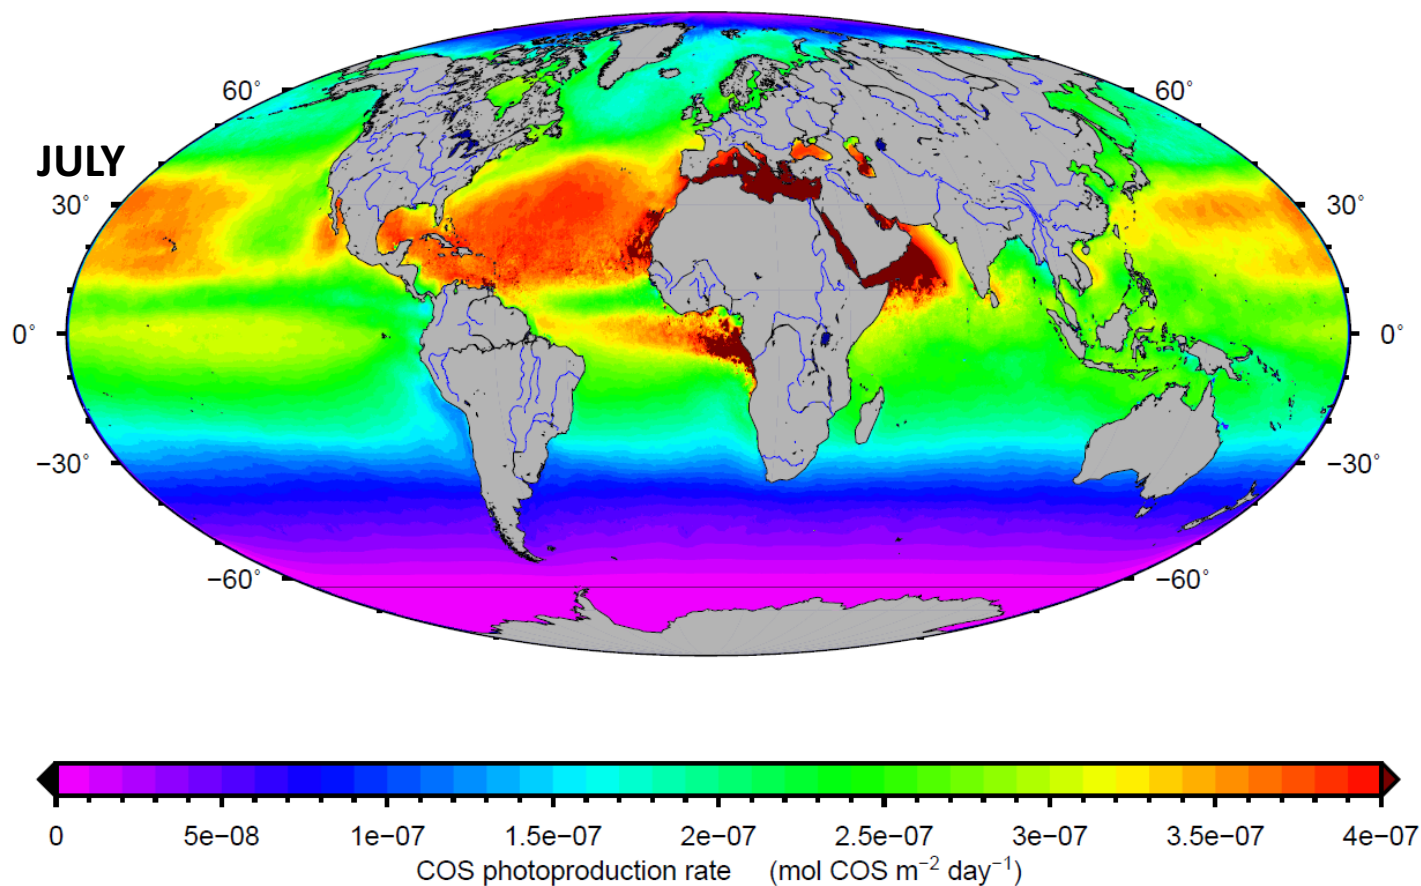

Integrated from 0- to depth of max UV penetration

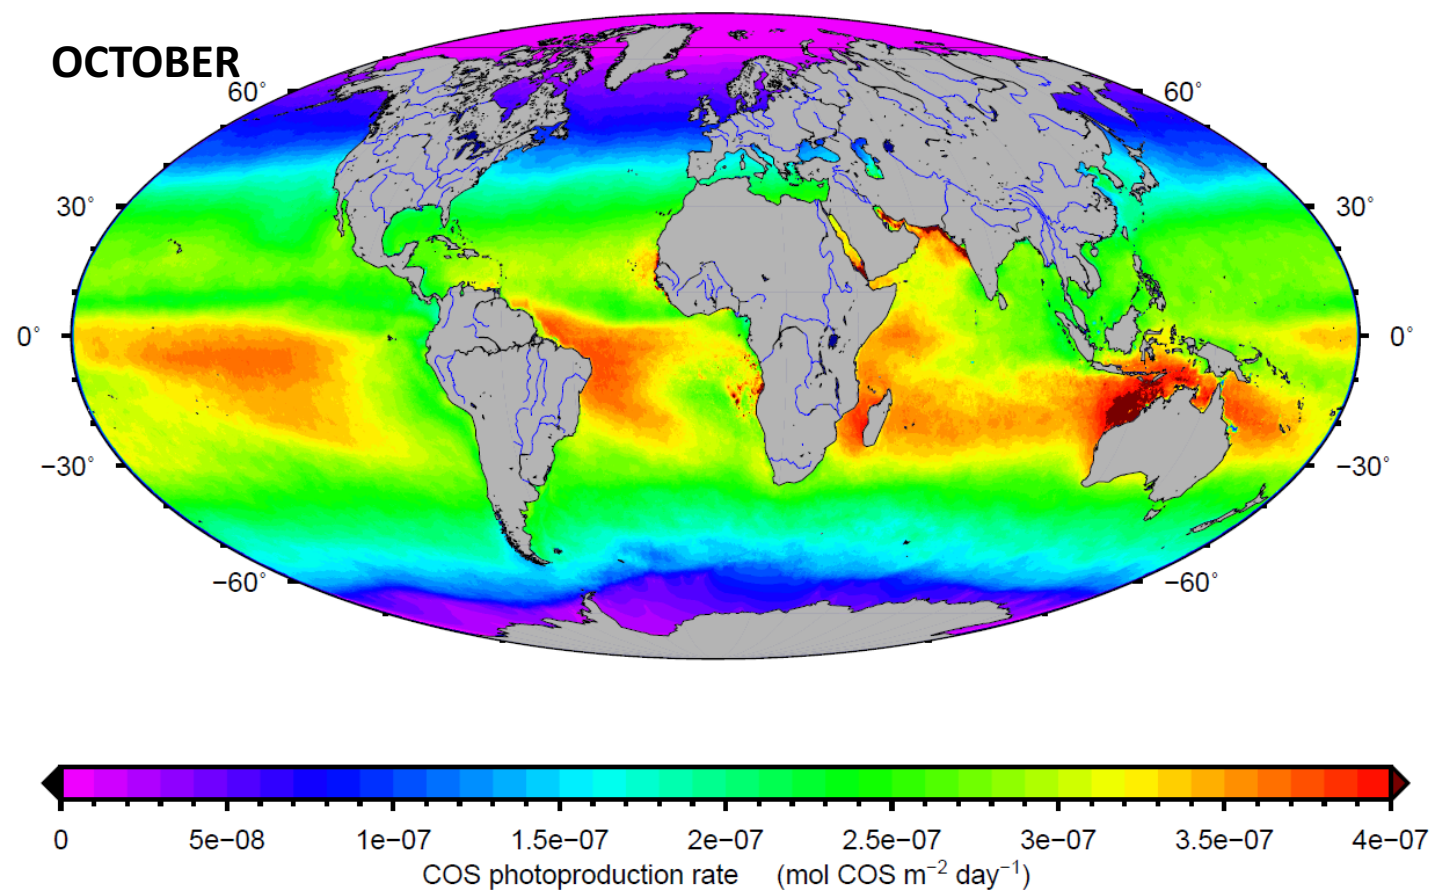



JULY

OCTOBER

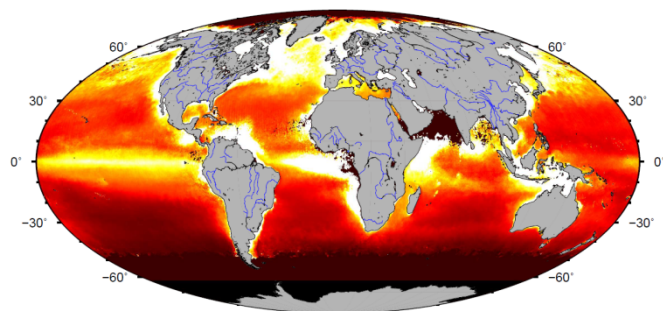

0-

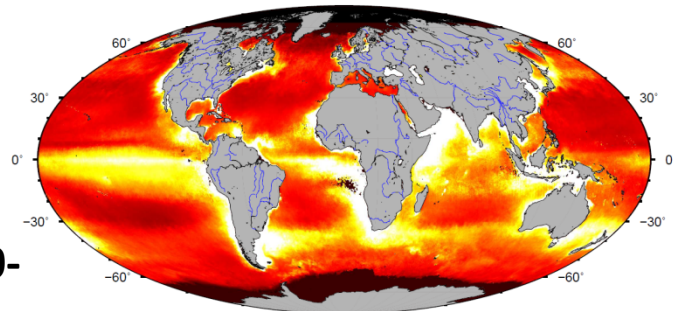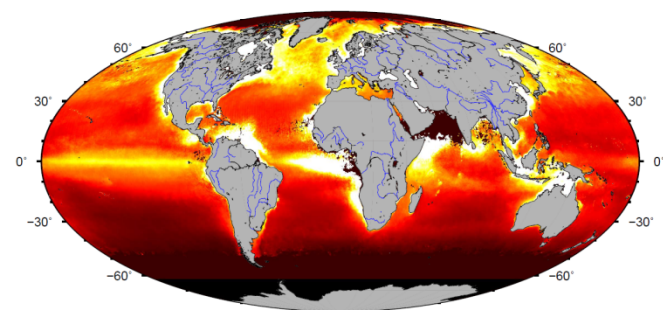

1m

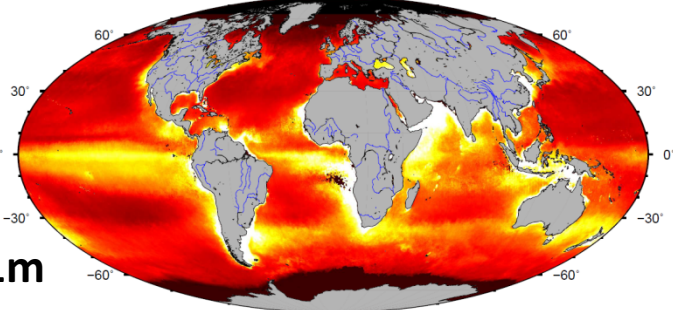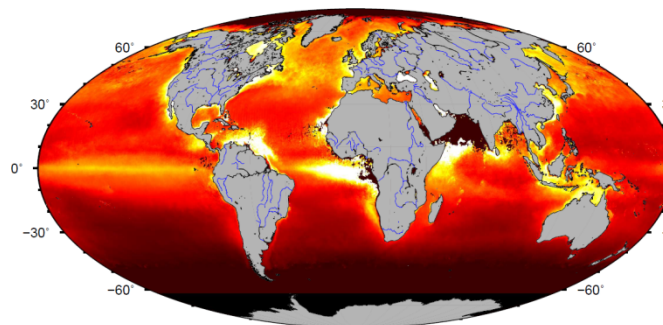

2m

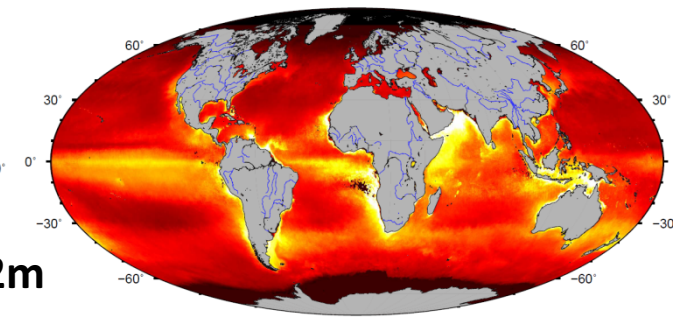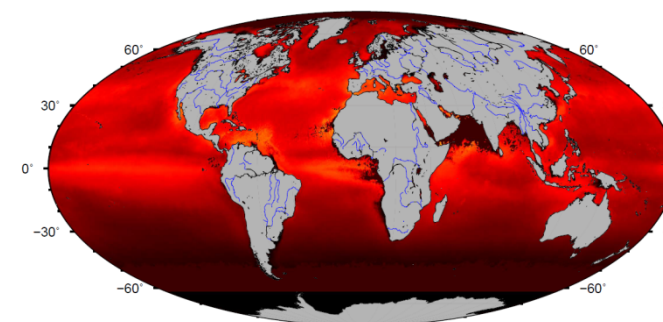

5m

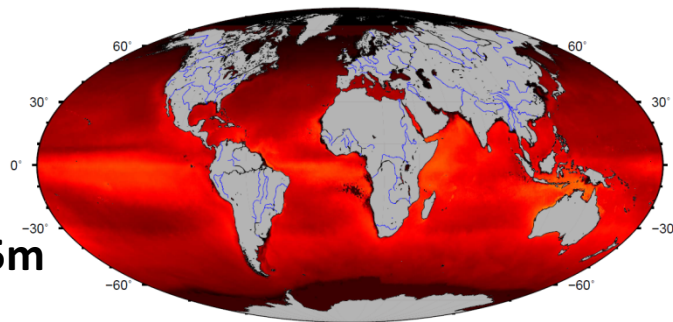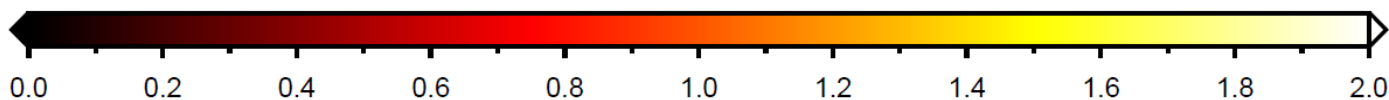

COS photoproduction rate at Xm depth (pmol COS L<sup>-1</sup> h<sup>-1</sup>)

**JULY**

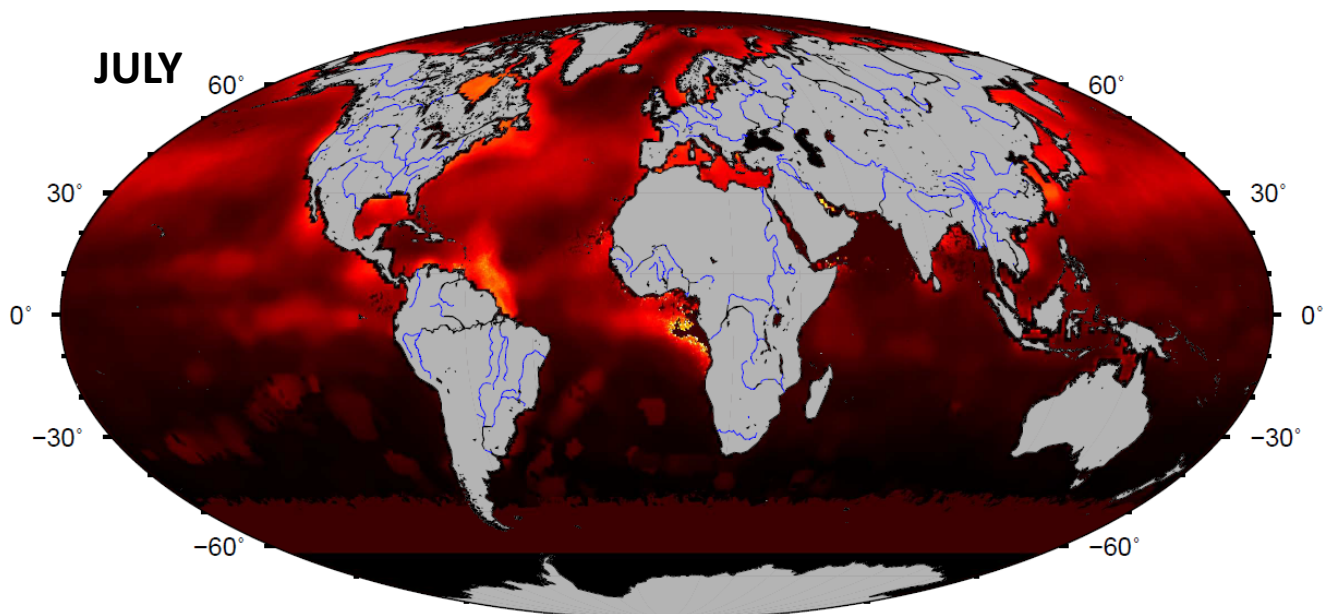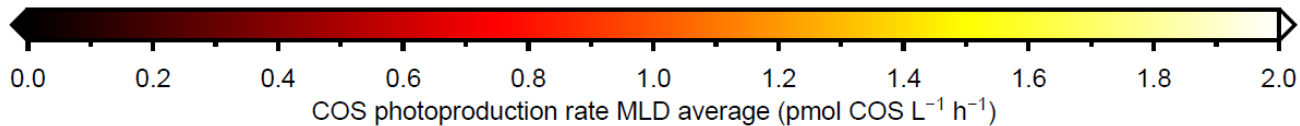

**OCTOBER**

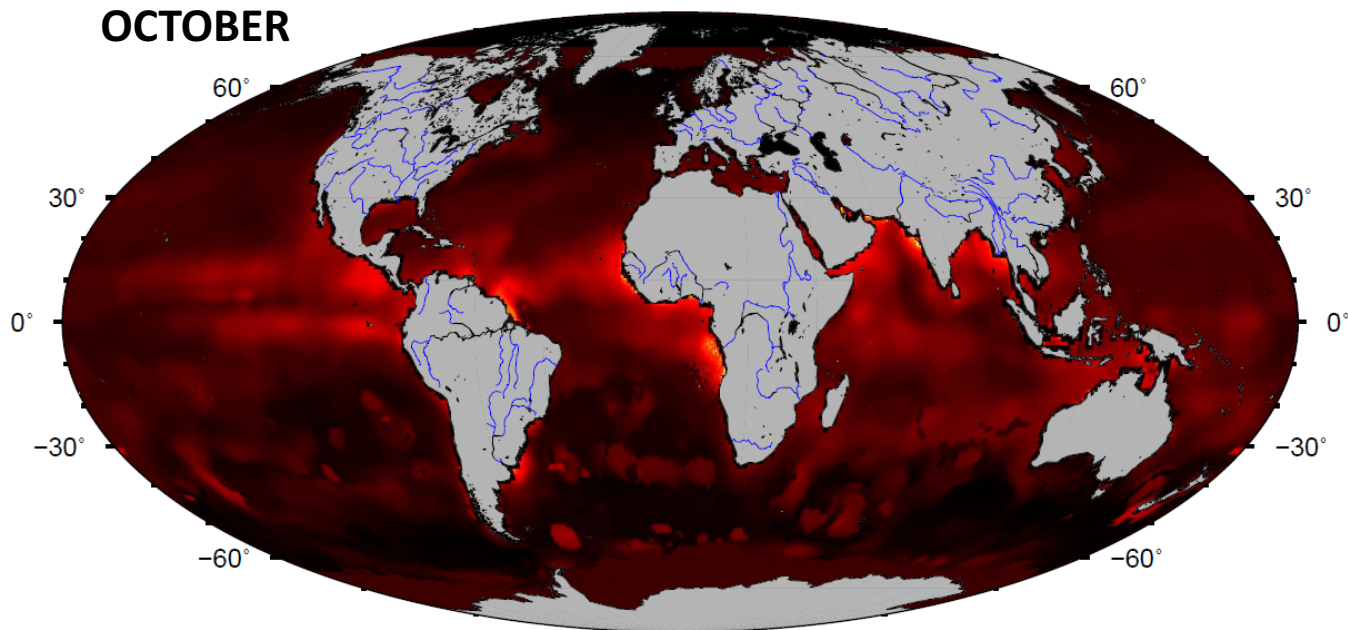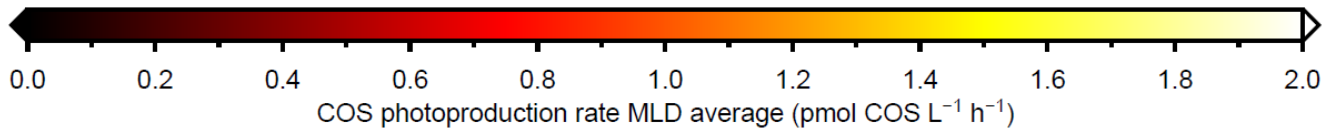

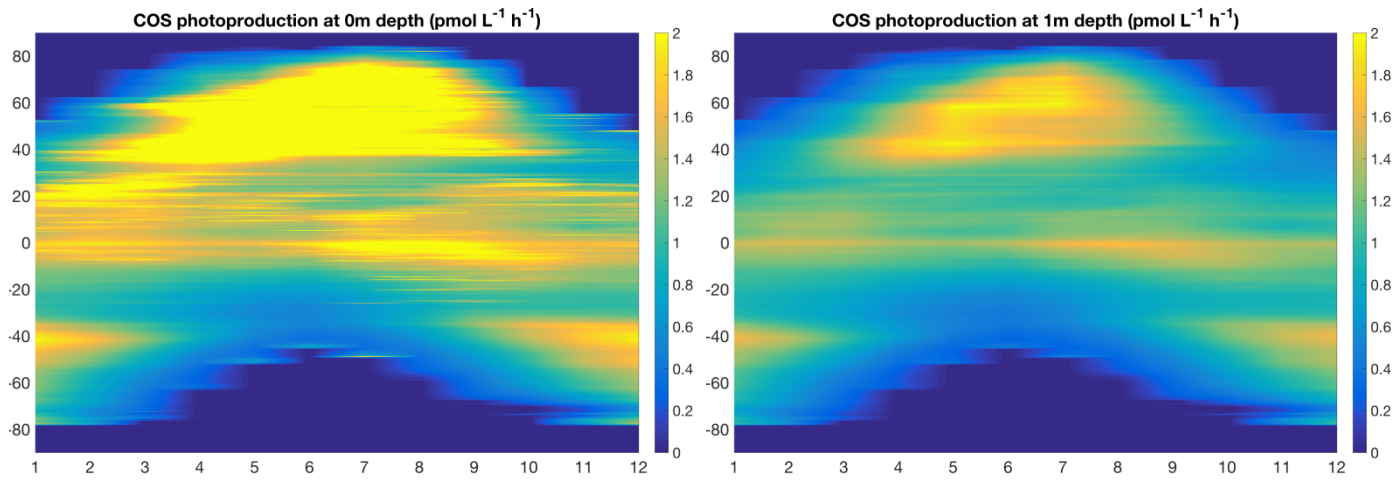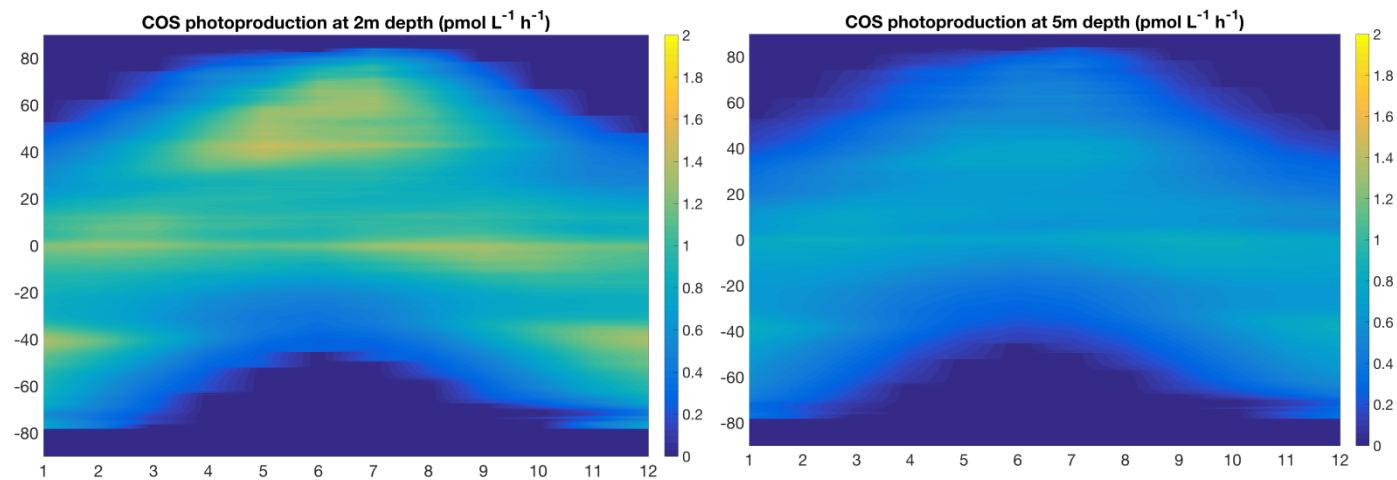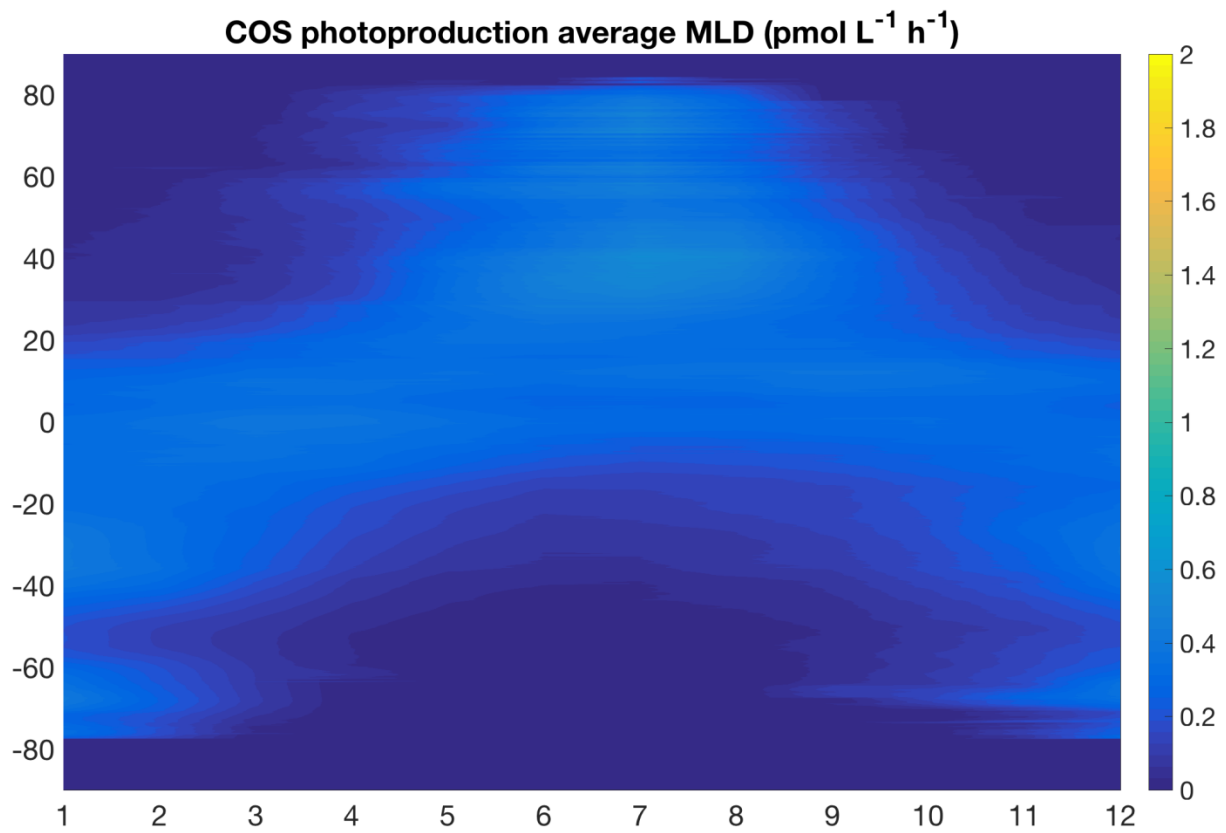

Supplement: Supplementary file [file acp-2016-778-SC2-supplement.pdf]
